# Supplementary material for: Effects of probiotics combined with dietary and lifestyle modification on clinical, biochemical, and radiological parameters in obese children with nonalcoholic fatty liver disease/nonalcoholic steatohepatitis: a randomized clinical trial
Source: PubMed Central journal article supplement — Clin Exp Pediatr. 2021 Nov 11;65(6):304–11. doi: 10.3345/cep.2021.00787 (PMC9171460; doi:10.3345/cep.2021.00787), 2021-11-11
Supplement: cep-2021-00787-suppl1.pdf [file cep-2021-00787-suppl1.pdf]

## Supplementary material 1

Amount of food portions to be taken from each food group for each age category

| Food group             | No. of portions that should be taken by each age category |             | List of portion sizes of food belonging to each group                                                                                                                                                                                                                                                                                                                                                                                                                                                                                                                                       |
|------------------------|-----------------------------------------------------------|-------------|---------------------------------------------------------------------------------------------------------------------------------------------------------------------------------------------------------------------------------------------------------------------------------------------------------------------------------------------------------------------------------------------------------------------------------------------------------------------------------------------------------------------------------------------------------------------------------------------|
|                        | 8–11 years                                                | 12–15 years |                                                                                                                                                                                                                                                                                                                                                                                                                                                                                                                                                                                             |
| Starchy foods          | 4–6                                                       | 6–8         | 1 Portion size is equivalent for<br>1 Cup cooked rice, pasta, noodles<br>1 Slice of bread (1/9th of 450-g loaf of bread)<br>1 Cup porridge, 1 cup breakfast cereal flakes<br>5 String hoppers<br>2 Hoppers<br>Roti (about 10-cm diameter and 0.5-cm thickness)<br>1 Those (about 10-cm diameter)<br>1 Parata (about 15-cm diameter)<br>½ Nan (about 8-cm diameter and 2-cm thickness)<br>Boiled corn of ¾ cup<br>½ Cup of pasta, spaghetti, macaroni<br>¼ Cup of boiled jack, bread fruit etc.<br>1 Piece of pittu (3 × 2 cm piece)<br>Cream cracker or nonsugary biscuits<br>½ cup of yams |
| Pulses and legumes     | 1                                                         | 1           | ½ Cup cooked green gram, kadala, cowpea, dhal and soya bean                                                                                                                                                                                                                                                                                                                                                                                                                                                                                                                                 |
| Vegetables             | 2–3                                                       | 3–4         | 75 g or ½ cup cooked leafy vegetables<br>1 Cup salad vegetables (raw)                                                                                                                                                                                                                                                                                                                                                                                                                                                                                                                       |
| Fruits                 | 2                                                         | 2–3         | 1 Medium piece/fruit of, eg apple, banana, orange, pear, papaw, mango, guawa, custard apple, pineapple (or equal to the content of 1 cup)<br>½ Cup or 1½ table spoon of plums<br>½ Glass (100 mL) of fresh juice (papaw, water melon, orange, lemon)                                                                                                                                                                                                                                                                                                                                        |
| Milk and milk products | 2                                                         | 2–3         | 200-mL (one cup) fresh<br>30 g (2 table spoons) of reconstituted dried milk<br>1 Slice of cheese<br>80-g yogurt (~1 cup)                                                                                                                                                                                                                                                                                                                                                                                                                                                                    |
